# Supplementary material
Source: PubMed Central journal article supplement (PMC7088544)
Supplement: 11262_2009_411_MOESM1_ESM.pdf [file 11262_2009_411_MOESM1_ESM.pdf]

## Supplementary Information

**Article:** Genetic characterization of 2006-2008 isolates Chikungunya virus from Kerala, South India by whole genome sequence analysis

**Journal name:** Virus Genes

**Authors:** E.Sreekumar<sup>a\*</sup>, Aneesh Issac<sup>a#</sup>, Sajith Nair<sup>a#</sup>, Ramkumar Hariharan<sup>b</sup>, M.B. Janki<sup>b</sup>, D.S. Arathy<sup>a</sup>, R. Regu<sup>c</sup>, Thomas Mathew<sup>d</sup>, M. Anoop<sup>a</sup>, K.P.Niyas<sup>a</sup> and M.R. Pillai<sup>b</sup>

<sup>a</sup>Molecular Virology Laboratory; <sup>b</sup>Translational Cancer Research Laboratory, Rajiv Gandhi Centre for Biotechnology (RGCB), Thycaud P.O., Thiruvananthapuram, 695014, Kerala, India

<sup>c</sup>National Institute of Communicable Diseases (NICD), Kozhikkode, Kerala, India

<sup>d</sup>Department of Community Medicine, T.D Medical College, Alappuzha, Kerala, India

\*corresponding author

Tel.: +91 471 2529517; Fax: +91 471 2348096

E-mail address: [esreekumar@rgcb.res.in](mailto:esreekumar@rgcb.res.in) (E.Sreekumar)

**Table 1:** Details of clinical samples included in the study for sequence analysis

| Patient Sample No. | Age     | Sex | Date of collection | Place of Collection | Unique Mutations |          |            |
|--------------------|---------|-----|--------------------|---------------------|------------------|----------|------------|
|                    |         |     |                    |                     | E1 A226V         | E2 K252Q | nsP2 L539S |
| RGCB03-06          | 48      | F   | 07-10-06           | Kayamkulam          | N                | N        | N          |
| RGCB 05-06         | 38      | F   | 07-10-06           | Kayamkulam          | N                | N        | N          |
| RGCB 40-07         | 50      | F   | 12-07-07           | Pathanamthitta      | Y                | N        | N          |
| RGCB 44-07         | 45      | M   | 12-07-07           | Pathanamthitta      | N                | N        | N          |
| RGCB 63-07         | 65      | F   | 12-07-07           | Punalur             | Y                | Y        | Y          |
| RGCB 65-07         | 13      | F   | 12-07-07           | Punalur             | Y                | N        | N          |
| RGCB 69-07         | 40      | F   | 12-07-07           | Punalur             | Y                | N        | N          |
| RGCB 70-07         | 35      | F   | 12-07-07           | Punalur             | Y                | Y        | Y          |
| RGCB71-07          | 42      | M   | 12-07-07           | Punalur             | N                | N        | N          |
| RGCB74-07          | 45      | F   | 12-07-07           | Punalur             | Y                | Y        | Y          |
| RGCB75-07          | 20      | M   | 12-07-07           | Punalur             | Y                | N        | Y          |
| RGCB79-07          | N.A     | F   | 12-07-07           | Punalur             | N                | N        | N          |
| RGCB80-07          | 22      | M   | 12-07-07           | Punalur             | Y                | Y        | Y          |
| RGCB100-07         | 13      | M   | 12-07-07           | Kottayam            | Y                | N        | N          |
| RGCB102-07         | 64      | M   | 12-07-07           | Kottayam            | Y                | N        | N          |
| RGCB106-07         | 4       | F   | 12-07-07           | Kanjirapally        | Y                | N        | N          |
| RGCB112-07         | 8       | F   | 13-07-07           | Punalur             | Y                | Y        | Y          |
| RGCB116-07         | 46      | F   | 13-07-07           | Punalur             | Y                | Y        | Y          |
| RGCB120-07         | 17      | M   | 13-07-07           | Punalur             | Y                | Y        | Y          |
| RGCB153-07         | 54      | M   | 13-07-07           | Anchal              | Y                | Y        | Y          |
| RGCB156-07         | 28      | M   | 13-07-07           | Anchal              | Y                | Y        | Y          |
| RGCB157-07         | 22      | F   | 13-07-07           | Anchal              | Y                | N        | N          |
| RGCB176-07         | 25      | M   | 13-07-07           | Kanjirapally        | Y                | N        | N          |
| RGCB283-07         | N.A     | F   | 19-07-07           | Trivandrum          | Y                | Y        | Y          |
| RGCB300-07         | 49      | F   | 06-08-07           | Trivandrum          | Y                | Y        | Y          |
| RGCB301-07         | 23      | M   | 06-08-07           | Trivandrum          | Y                | Y        | Y          |
| RGCB305-07         | 19 days | N.A | 13-08-07           | Trivandrum          | Y                | N        | N          |
| RGCB355-08         | 25      | F   | 29-05-08           | Panathady           | Y                | Y        | Y          |
| RGCB356-08         | 46      | F   | 29-05-08           | Panathady           | Y                | N        | N          |
| RGCB358-08         | 16      | M   | 29-05-08           | Panathady           | Y                | N        | N          |
| RGCB359-08         | 69      | F   | 29-05-08           | Panathady           | Y                | N        | N          |
| RGCB360-08         | 38      | F   | 29-05-08           | Panathady           | Y                | N        | N          |
| RGCB361-08         | 63      | F   | 29-05-08           | Panathady           | Y                | Y        | Y          |
| RGCB362-08         | 80      | M   | 29-05-08           | Panathady           | Y                | Y        | Y          |
| RGCB363-08         | 8       | F   | 29-05-08           | Panathady           | Y                | N        | N          |
| RGCB365-08         | 48      | M   | 29-05-08           | Panathady           | Y                | Y        | Y          |
| RGCB367-08         | 37      | F   | 29-05-08           | Panathady           | Y                | N        | N          |
| RGCB370-08         | 41      | M   | 29-05-08           | Panathady           | Y                | N        | N          |

Samples used for whole genome analysis are highlighted.

Y-present; N-Absent; N.A-not available

**Table 2.** Location of nucleotide changes that were identified only in the 2006, 2007 & 2008 RGCB isolates among the various isolates studied. The GenBank Accession number and the strain name of the isolates, other than RGCB isolates, included in the comparative analysis are- AF369024 (S-27); EF027139 (IND-00-MH4); EU564335 (CHIK31); EF210157 (DRDE-06); EU2444823 (ITA07-RA1); EU037962 (Wuzerberg 1); EF012359 (D570/06); DQ443544 (LR2006\_OPY1); EU564334 (TM25); EF027134 (IND-06-AP3); EF027135 (IND-06-KA15); EF027136 (IND-06-MH2); EF027137 (IND-06-RJ1); EF027138 (IND-06-TN1).

| Isolate      | Nucleotide changes exclusively observed in RGCB isolates<br>(Numbering with respect to S-27) |                                                                 |                                                                                                                               |                                                                              |                                                                                                                                                  |                          |                         |                                                                                                                    |                         |                                                                                                  | 3' NTR                          |
|--------------|----------------------------------------------------------------------------------------------|-----------------------------------------------------------------|-------------------------------------------------------------------------------------------------------------------------------|------------------------------------------------------------------------------|--------------------------------------------------------------------------------------------------------------------------------------------------|--------------------------|-------------------------|--------------------------------------------------------------------------------------------------------------------|-------------------------|--------------------------------------------------------------------------------------------------|---------------------------------|
|              | 5' NTR                                                                                       | Coding region                                                   |                                                                                                                               |                                                                              |                                                                                                                                                  |                          |                         |                                                                                                                    |                         | 3' NTR                                                                                           |                                 |
|              |                                                                                              | Non-structural protein                                          |                                                                                                                               |                                                                              |                                                                                                                                                  | Structural protein       |                         |                                                                                                                    |                         |                                                                                                  |                                 |
|              | nsP1                                                                                         | nsP2                                                            | nsP3                                                                                                                          | nsP4                                                                         | C                                                                                                                                                | E3                       | E2                      | 6K                                                                                                                 | E1                      |                                                                                                  |                                 |
| RGCB03/KL06  | -                                                                                            | -                                                               | A4051G                                                                                                                        | <b>T4825A</b> (D250E)                                                        | A6310G<br>T6388C<br>T6517T<br>G6589A<br><b>T7131A</b> (M489K)                                                                                    | G8214T                   | -                       | G9487A (E316K)                                                                                                     | -                       | <b>A10343G</b> (E127G)<br><b>T10546C</b> (Y195H)<br>A10812G<br>G11142A<br><b>A11179G</b> (T396A) | -                               |
| RGCB05/KL06  | -                                                                                            | -                                                               | -                                                                                                                             | <b>C4148T</b> (P26S)                                                         | T5980C<br>A6106G                                                                                                                                 | <b>G8162A</b><br>(G199D) | -                       | T8592A<br>C8760T                                                                                                   | -                       | <b>A10552G</b> (M197V)                                                                           | -                               |
| RGCB80/KL07  | -                                                                                            | T1381G <sup>#</sup><br><b>A1668G</b> (D536G)                    | <b>T1824C</b> (V48A)<br>A2209G<br><b>T2223C</b> (V181A)<br><b>A2666G</b> (K329E)<br><b>T3297C</b> (L539S)<br>T3397C<br>C4009T | <b>A4355C</b> (K94Q)<br>C5014T                                               | A6076G<br><b>T6546C</b> (V289A)<br>C7450T <sup>#</sup>                                                                                           | C7983T <sup>#</sup>      | -                       | <b>A9295C</b> (K252Q)<br>G9654A<br>G9681A <sup>#</sup>                                                             | -                       | A10356G<br><b>C10670T*</b> (A226V)<br><b>T11290C</b> (C433R)                                     | C11614T <sup>#</sup>            |
| RGCB120/KL07 | -                                                                                            | T1381G <sup>#</sup>                                             | <b>T2391G</b> (L237R)<br><b>T2394C</b> (L238P)<br><b>T3297C</b> (L539S)<br>T3397C                                             | C5014T                                                                       | A6076G<br>T6805C<br>C7450T <sup>#</sup>                                                                                                          | C7983T <sup>#</sup>      | -                       | T8895C<br><b>A9295C</b> (K252Q)<br><b>A9623G</b> (E361G)<br>G9654A<br>G9681A <sup>#</sup><br><b>T9787G</b> (C416G) | <b>A9988G</b><br>(S61G) | A10356G<br><b>A10514G</b> (D184G)<br><b>C10670T*</b> (A226V)                                     | C11614T <sup>#</sup><br>T11641C |
| RGCB355/KL08 | -                                                                                            | T1381G <sup>#</sup>                                             | <b>T3297C</b> (L539S)<br>T3397C<br><b>T3804C</b> (L708P)                                                                      | <b>T4677G</b> (L201R)<br>C5014T<br>A5116G<br>A5392G<br><b>A5394G</b> (E440G) | A5725G<br>T5770C<br>G5824A<br><b>T6011C</b> (S116P)<br>A6076G<br>T6136C<br><b>A6419G</b> (N252D)<br><b>A7100G</b> (M479V)<br>C7450T <sup>#</sup> | C7983T <sup>#</sup>      | -                       | <b>A8757G</b> (N72S)<br><b>A9295C</b> (K252Q)<br>G9654A<br>G9681A <sup>#</sup>                                     | -                       | A10356G<br><b>C10670T*</b> (A226V)<br><b>G10736A</b> (G248E)<br><b>A11225G</b> (K411R)           | T11487C<br>C11614T <sup>#</sup> |
| RGCB356/KL08 | -                                                                                            | <b>G389A</b> (G105R)<br>C725T<br><b>T848C</b> (W258R)<br>C1603T | A2912G<br>G2944A<br>A3283G                                                                                                    | A4646G                                                                       | C6397T<br>A7273G                                                                                                                                 | <b>T7649C</b><br>(I28T)  | <b>A8479G</b><br>(R44G) | A9114G<br><b>G9226A</b> (V229I)<br><b>G9589A</b> (G350S)                                                           | -                       | <b>T10004C</b> (V14A)<br><b>C10670T*</b> (A226V)<br><b>C10904T</b> (P304L)                       | A11354G<br>A11673G              |

<sup>#</sup> This substitution was also seen in ITA07-RA1

\* This change was also present in the strains ITA07-RA1, Wuzerberg 1, D570/06, TM25 and LR2006\_OPY1; but not in any of the Indian strains analysed in the study.

Non-synonymous changes are shown in bold letters, and resulting amino acid changes (numbered with respect to the corresponding protein position) is shown in parenthesis.

**Table. 3** CHIKV Structural protein epitopes associated with **HLA-A** as predicted by Epi-Jen server

| Mutation position in the polypeptide | HLA-A alleles     |                                      |                                        |                                     |                   |                   |                   |                                                            |                   |                   |                   |
|--------------------------------------|-------------------|--------------------------------------|----------------------------------------|-------------------------------------|-------------------|-------------------|-------------------|------------------------------------------------------------|-------------------|-------------------|-------------------|
|                                      | A*0101            | A*0201                               | A*0202                                 | A*0203                              | A*0206            | A*0301            | A*1101            | A*24                                                       | A*3101            | A*6801            | A*6802            |
| I28T                                 | -                 | -                                    | -                                      | -                                   | -                 | -                 | -                 | -                                                          | -                 | -                 | -                 |
| G199D                                | -                 | -                                    | -                                      | -                                   | -                 | GAVQYSGGR (27.1)  | GAVQYSGGR (26.98) | QYSGGRFTI (1.492)                                          | -                 | GAVQYSGGR (18.88) | -                 |
| R305G                                | DNVMPGGY (36.31)  | VMPGGYQL ((0.18))                    | VMPGGYQL (44.36)                       | VMPGGYQL (4.79)                     | -                 | -                 | -                 | -                                                          | -                 | -                 | -                 |
| V554I                                | VTNHKKWQY (17.7)  | -                                    | -                                      | -                                   | KVDQCHAAV (93.97) | HAAVTNHKK (25.7)  | HAAVTNHKK (25.82) | -                                                          | -                 | -                 | KVDQCHAAV (8.91)  |
| K577Q                                | -                 | -                                    | -                                      | -                                   | -                 | RNAELGDRK (98.86) | RNAELGDRK (22.44) | -                                                          | -                 | -                 | -                 |
| E641K                                | -                 | VTHKKEVVL (9.42)                     | VTHKKEVVL (32.96)                      | -                                   | -                 | -                 | -                 | -                                                          | -                 | -                 | VVTHKKEVV (8.65)  |
| G675S                                | -                 | -                                    | -                                      | -                                   | -                 | -                 | -                 | -                                                          | -                 | -                 | -                 |
| E686G                                | IILYYEY (4.1)     | ELYPTMTVV (0.7)<br>EILYYEY (0.78)    | -                                      | ELYPTMTVV (4.06)                    | -                 | IILYYEY (31.48)   | -                 | LYYYELYPT (1.017)<br>YYELYPTMT (1.364)<br>YYYELYPTM (1.05) | -                 | -                 | -                 |
| C741G                                | -                 | FLLSLICCI (0.13)<br>SLICCIRTA (6.19) | FLLSLICCI (36.56)                      | FLLSLICCI (0.23)<br>SLICCIRTA (5.5) | FLLSLICCI (27.67) | LICCIRTA (1.88)   | -                 | PFLLSLICC (1.007)                                          | LLSLICCIR (20.94) | -                 | SLICCIRTA (82.6)  |
| S808G                                | IGAHTVSAY (37.67) | HTVSAYEHV (6.84)                     | HTVSAYEHV (50.58)                      | -                                   | HTVSAYEHV (29.92) | -                 | -                 | -                                                          | -                 | -                 | -                 |
| V813A                                | -                 | HTVSAYEHV (6.84)                     | HTVSAYEHV (50.58)<br>HVTVIPNTV (61.38) | -                                   | HTVSAYEHV (29.92) | -                 | -                 | AYEHVTVIP (1.362)                                          | -                 | -                 | HVTVIPNTV (9.51)  |
| E926G                                | -                 | -                                    | -                                      | -                                   | -                 | KTEFASAYR (6.18)  | KTEFASAYR (20.56) | -                                                          | -                 | KTEFASAYR (15.1)  | -                 |
| D983G                                | -                 | -                                    | WTPFDNKIV (17.58)                      | WTPFDNKIV (25)                      | WTPFDNKIV (80.17) | SAWTPFDNK (1.73)  | SAWTPFDNK (3.36)  | AWTPFDNKI (0.804)                                          | -                 | SAWTPFDNK (28.05) | WTPFDNKIV (38.82) |
| Y994H                                | KGDVYNMY (44.36)  | -                                    | -                                      | -                                   | -                 | -                 | -                 | VYKGDVYM (1.167)<br>VYNMDYPPF (1.704)                      | -                 | -                 | -                 |
| A1035V                               | AAGTVHVPY (3.62)  | QLVLQRPAA (5.45)                     | LQRPAAGTV (27.61)                      | LQRPAAGTV (30.97)                   | LQRPAAGTV (52.24) | AAGTVHVPY (74.99) | -                 | -                                                          | -                 | -                 | -                 |
| G1057E                               | -                 | WLKERGASL (6.61)                     | WLKERGASL (5.62)                       | WLKERGASL (0.16)                    | -                 | -                 | -                 | KYWLKERGA (1.097)                                          | -                 | -                 | -                 |
| T1205A                               | -                 | TLGVQDISA (3.59)                     | -                                      | PASHTTLGV (20.56)                   | PASHTTLGV (29.17) | -                 | -                 | NYPASHTTL (1.509)                                          | -                 | -                 | -                 |
| K1220R                               | -                 | -                                    | VVQKITGGV (78.89)                      | -                                   | VVQKITGGV (9.73)  | ATAMSWVK (8.71)   | ATAMSWVK (2.87)   | -                                                          | -                 | -                 | VVQKITGGV (2.76)  |

The values given within the bracket indicates the 50% inhibitory concentration (IC<sub>50</sub>) of the peptide, a measure of the binding affinity. An IC<sub>50</sub> value <50 is considered as a good affinity. Mutation points in the predicted epitopes are marked as bold.

**Table. 4** CHIKV Structural protein epitopes associated with **HLA-B** as predicted by Epi-Jen server

| Mutation position in the polypeptide | HLA-B alleles        |                                              |                                              |                                              |                                            |                      |       |
|--------------------------------------|----------------------|----------------------------------------------|----------------------------------------------|----------------------------------------------|--------------------------------------------|----------------------|-------|
|                                      | B07                  | B27                                          | B40                                          | B44                                          | B51                                        | B53                  | B3501 |
| I28T                                 | -                    | IRPRPRPQR<br>(1.221)<br>PRPTIQVIR<br>(1.293) | -                                            | -                                            | TPRPTIQVI<br>(1.52)                        | TPRPTIQVI<br>(83.56) | -     |
| G199D                                | AVQYSGGRF<br>(16.94) | GRFTIPTGA<br>(1.598)                         | -                                            | -                                            | -                                          | -                    | -     |
| R305G                                | -                    | MRPGYYQLL<br>(1.555)                         | -                                            | -                                            | -                                          | -                    | -     |
| V554I                                | -                    | -                                            | -                                            | -                                            | -                                          | -                    | -     |
| K577Q                                | -                    | -                                            | AELGDRK GK<br>(0.968)                        | AELGDRK GK<br>(0.968)                        | -                                          | -                    | -     |
| E641K                                | -                    | -                                            | VTHKKEVVL<br>(0.619)                         | VTHKKEVVL<br>(0.619)                         | -                                          | -                    | -     |
| G675S                                | -                    | -                                            | HGHPHEIIL<br>(0.507)                         | HGHPHEIIL<br>(0.507)                         | TAHGHPHEI<br>(4.49)<br>HGHPHEIIL<br>(47.1) | -                    | -     |
| E686G                                | -                    | -                                            | YELYPTMTV<br>(0.812)                         | YELYPTMTV<br>(0.812)                         | -                                          | -                    | -     |
| C741G                                | -                    | -                                            | -                                            | -                                            | -                                          | -                    | -     |
| S808G                                | -                    | -                                            | -                                            | -                                            | SAYEHVTVI<br>(15.7)                        | -                    | -     |
| V813A                                | -                    | -                                            | -                                            | -                                            | SAYEHVTVI<br>(15.7)                        | -                    | -     |
| E926G                                | -                    | -                                            | SESCKTEFA<br>(1.139)<br>TEFASAYRA<br>(1.137) | SESCKTEFA<br>(1.139)<br>TEFASAYRA<br>(1.137) | -                                          | -                    | -     |
| D983G                                | -                    | -                                            | -                                            | -                                            | TPFDNKIVV<br>(14.55)                       | -                    | -     |
| Y994H                                | IVVYKGDVY<br>(92.47) | -                                            | -                                            | -                                            | -                                          | -                    | -     |
| A1035V                               | RPAAGTVHV<br>(13.37) | QRPAAGTVH<br>(1.365)                         | -                                            | -                                            | RPAAGTVH<br>(30.2)                         | -                    | -     |
| G1057E                               | -                    | -                                            | -                                            | -                                            | -                                          | -                    | -     |
| T1205A                               | -                    | -                                            | -                                            | -                                            | PASHTTLGV<br>(79.25)                       | -                    | -     |
| K1220R                               | -                    | -                                            | -                                            | -                                            | TAMSWVQKI<br>(19.32)                       | -                    | -     |

The values given within the bracket indicates the 50% inhibitory concentration (IC<sub>50</sub>) of the peptide, a measure of the binding affinity. An IC<sub>50</sub> value <50 is considered as a good affinity. Mutation points in the predicted epitopes are marked as bold.
